# Supplementary material for: Multilevel visual motion opponency in Drosophila
Source: PubMed Central journal article supplement (PMC10620086; doi:10.1038/s41593-023-01443-z), 2023-10-02
Supplement: 41593_2023_1443_MOESM1_ESM.pdf [file 41593_2023_1443_MOESM1_ESM.pdf]

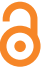

---

# Multilevel visual motion opponency in *Drosophila*

---

In the format provided by the authors and unedited

---



---

# Multilevel visual motion opponency in *Drosophila*

---

In the format provided by the authors and unedited

---

**Supplementary Table 1. List of all experimental genotypes**

| Figure                | Short Name                       | Genotype                                                             |
|-----------------------|----------------------------------|----------------------------------------------------------------------|
| <b>Figure 1b-c</b>    | T4/T5 > Chr2                     | norpA <sup>7</sup> ; UAS-ChR2-H134R; R42F06-Gal4                     |
|                       | VS > Chr2                        | w+; UAS-ChR2-H134R; R24E09-Gal4                                      |
| <b>Figure 1d,h</b>    | VS > ArcLight                    | w+; UAS-ArcLight/ +; R24E09-Gal4/ +                                  |
| <b>Figure 1e,i</b>    | LPI3-4 > ArcLight                | w+; UAS-ArcLight/ +; R20D01-Gal4/ +                                  |
| <b>Figure 1f,j</b>    | LPI4-3 > ArcLight                | w+; UAS-ArcLight/ +; R38G02-Gal4/ +                                  |
| <b>Figure 1g,k</b>    | T4c > ArcLight                   | w+/ w-; VT15785-AD/ UAS-ArcLight; VT50384-DBD/ +                     |
| <b>Figure 2a-c</b>    | VS > ArcLight (control)          | w+/ w-; UAS-ArcLight/ +; R24E09-Gal4/ lexAop-TNT                     |
|                       | VS > ArcLight (T4/T5c block)     | w+/ w-; UAS-ArcLight/ +; R24E09-Gal4/ VT50384-lexA, lexAop-TNT       |
| <b>Figure 2d-f</b>    | LPI3-4 > ArcLight (control)      | w+/ w-; UAS-ArcLight/ +; R20D01-Gal4/ lexAop-TNT                     |
|                       | LPI3-4 > ArcLight (T4/T5c block) | w+/ w-; UAS-ArcLight/ +; R20D01-Gal4/ VT50384-lexA, lexAop-TNT       |
| <b>Figure 2g-i</b>    | LPI4-3 > ArcLight (control)      | w+/ w-; UAS-ArcLight/ +; R38G02-Gal4/ lexAop-TNT                     |
|                       | LPI4-3 > ArcLight (T4/T5c block) | w+/ w-; UAS-ArcLight/ +; R38G02-Gal4/ VT50384-lexA, lexAop-TNT       |
| <b>Figure 3i-j</b>    | wildtype                         | Canton S                                                             |
| <b>Figure 4a</b>      | VS > GluClα-GFP                  | w-; VT58487-AD/ UAS-GluClα-GFP; R35G07-DBD/ UAS-tdTomato             |
| <b>Figure 4b</b>      | LPI3-4 > GluClα-GFP              | w-; VT61221-AD/ UAS-GluClα-GFP; VT45575-DBD/ UAS-tdTomato            |
| <b>Figure 4c</b>      | LPI4-3 > GluClα-GFP              | w-; R38G02-AD/ UAS-GluClα-GFP; R24A07-DBD/ UAS-tdTomato              |
| <b>Figure 4d</b>      | T4/T5c > GluClα-GFP              | w-; UAS-GluClα-GFP/+; VT50384-Gal4/ UAS-tdTomato                     |
| <b>Figure 4e-g</b>    | LPI4-3 > ArcLight (RNAi control) | w+; UAS-ArcLight/ UAS-GluRIA-RNAi; R38G02-Gal4/ +                    |
|                       | LPI4-3 > ArcLight (GluClα RNAi)  | w+; UAS-ArcLight/ UAS-GluClα-RNAi; R38G02-Gal4/ +                    |
| <b>Figure 5a-b</b>    | TNT control                      | w+/ w-; +; lexAop-TNT/ +                                             |
|                       | T4/T5c block                     | w+/ w-; +; VT50384-lexA, lexAop-TNT/ +                               |
| <b>Figure 5c-d</b>    | LPI4-3 > GC6f (control)          | w+/ w-; UAS-GCaMP6f/ +; R38G02-Gal4/ lexAop-TNT                      |
|                       | LPI4-3 > GC6f (T4/T5c block)     | w+/ w-; UAS-GCaMP6f/ +; R38G02-Gal4/ VT50384-lexA, lexAop-TNT        |
| <b>Figure 5e-f</b>    | T4/T5c > GC6m (control)          | w+/ w-; UAS-TNT/ +; VT50384-lexA, lexAop-GCaMP6m/ +                  |
|                       | T4/T5c > GC6m (LPI4-3 block)     | w+/ w-; UAS-TNT/ R38G02-AD; VT50384-lexA, lexAop-GCaMP6m/ R24A07-DBD |
| <b>Figure 6a-e</b>    | VS > GC6f                        | w+/ w-; UAS-GCaMP6f/ +; UAS-GCaMP6f/ R24E09-Gal4                     |
|                       | LPI3-4 > GC6f                    | w+/ w-; UAS-GCaMP6f/ +; UAS-GCaMP6f/ R20D01-Gal4                     |
|                       | LPI4-3 > GC6f                    | w+/ w-; UAS-GCaMP6f/ +; UAS-GCaMP6f/ R38G02-Gal4                     |
|                       | T4/T5c > GC6f                    | w+/ w-; UAS-GCaMP6f/ +; UAS-GCaMP6f/ VT50384-Gal4                    |
| <b>Figure 6g-h</b>    | T4/T5c > GC6f                    | w+/ w-; UAS-GCaMP6f/ +; UAS-GCaMP6f/ VT50384-Gal4                    |
|                       | T4/T5 > GC6f (control)           | w+/ w-; UAS-GCaMP6f/ +; R42F06-Gal4/ +                               |
|                       | T4/T5 > GC6f (T4/T5c block)      | w+/ w-; UAS-GCaMP6f/ +; R42F06-Gal4/ VT50384-lexA, lexAop-TNT        |
| <b>Figure 7c-h</b>    | wildtype                         | Canton S                                                             |
| <b>Ext. Fig. 1</b>    | VS > ArcLight                    | w+; UAS-ArcLight/ +; R24E09-Gal4/ +                                  |
| <b>Ext. Fig. 2</b>    | VS > GC6f                        | w+/ w-; UAS-GCaMP6f/ +; UAS-GCaMP6f/ R24E09-Gal4                     |
|                       | LPI3-4 > GC6f                    | w+/ w-; UAS-GCaMP6f/ +; UAS-GCaMP6f/ R20D01-Gal4                     |
|                       | LPI4-3 > GC6f                    | w+/ w-; UAS-GCaMP6f/ +; UAS-GCaMP6f/ R38G02-Gal4                     |
|                       | T4c > GC6f                       | w+; VT15785-AD/ UAS-GCaMP6f; VT50384-DBD/ UAS-GCaMP6f                |
| <b>Ext. Fig. 3c</b>   | wildtype                         | Canton S                                                             |
| <b>Ext. Fig. 4a</b>   | LPI3-4 > nAChRα7-GFP             | w-; VT61221-AD/ UAS-tdTomato; VT45575-DBD/ UAS-nAChRα7-GFP           |
| <b>Ext. Fig. 4b</b>   | LPI4-3 > nAChRα7-GFP             | w-; R38G02-AD/ UAS-tdTomato; R24A07-DBD/ UAS-nAChRα7-GFP             |
| <b>Ext. Fig. 5a,b</b> | LPI4-3 > GC6f                    | w+/ w-; UAS-GCaMP6f/ +; UAS-GCaMP6f/ R38G02-Gal4                     |
| <b>Ext. Fig. 5c,d</b> | T4/T5c > GC6f                    | w+; UAS-GCaMP6f/+; VT50384-Gal4/+                                    |
| <b>Ext. Fig. 5e,f</b> | T4c > GC6f                       | w+; VT15785-AD/ UAS-GCaMP6f; VT50384-DBD/ UAS-GCaMP6f                |
| <b>Ext. Fig. 5g,h</b> | T4c > ArcLight                   | w+/ w-; VT15785-AD/ UAS-ArcLight; VT50384-DBD/ +                     |
| <b>Ext. Fig. 6</b>    | T4c > GC6f                       | w+; VT15785-AD/ UAS-GCaMP6f; VT50384-DBD/ UAS-GCaMP6f                |
| <b>Ext. Fig. 8a-c</b> | wildtype                         | Canton S                                                             |

**Supplementary Table 2. Statistical analysis**

| Figure       | Comparison                                          | Statistical test                    | p-value                   |     |
|--------------|-----------------------------------------------------|-------------------------------------|---------------------------|-----|
| Figure 1l    | Correlation: LPI3-4 – LPI4-3                        | Wald test                           | 1.1407*10 <sup>-8</sup>   | *** |
| Figure 2c    | MOI: VS (ctrl) – VS (T4/T5c block)                  | Welch's t-test                      | 8.1344*10 <sup>-4</sup>   | *** |
|              | LDir: VS (ctrl) – VS (T4/T5c block)                 | Welch's t-test                      | 5.3057*10 <sup>-4</sup>   | *** |
| Figure 2f    | MOI: LPI3-4 (ctrl) – LPI3-4 (T4/T5c block)          | Welch's t-test                      | 1.2751*10 <sup>-3</sup>   | **  |
|              | LDir: LPI3-4 (ctrl) – LPI3-4 (T4/T5c block)         | Welch's t-test                      | 3.1044*10 <sup>-3</sup>   | **  |
| Figure 2i    | MOI: LPI4-3 (ctrl) – LPI4-3 (T4/T5c block)          | Welch's t-test                      | 2.8558*10 <sup>-5</sup>   | *** |
|              | LDir: LPI4-3 (ctrl) – LPI4-3 (T4/T5c block)         | Welch's t-test                      | 6.5523*10 <sup>-3</sup>   | **  |
| Figure 3j    | PD local – ND local                                 | Wilcoxon signed-rank test           | 0.32587                   | ns  |
| Figure 4g    | MOI: LPI4-3 (ctrl) – LPI4-3 (GluCl $\alpha$ -RNAi)  | Welch's t-test                      | 9.5774*10 <sup>-5</sup>   | *** |
|              | LDir: LPI4-3 (ctrl) – LPI4-3 (GluCl $\alpha$ -RNAi) | Welch's t-test                      | 0.01865                   | *   |
| Figure 5b    | MSI: VS (ctrl) – VS (T4/T5c block)                  | Student's t-test                    | 1.0934*10 <sup>-5</sup>   | *** |
| Figure 5d    | PD: LPI4-3 (ctrl) – LPI4-3 (T4/T5c block)           | Welch's t-test                      | 0.40606                   | ns  |
|              | ND: LPI4-3 (ctrl) – LPI4-3 (T4/T5c block)           | Welch's t-test                      | 9.0649*10 <sup>-3</sup>   | **  |
| Figure 5f    | TM: LPI4-3 (ctrl) – LPI4-3 (T4/T5c block)           | Welch's t-test                      | 4.9512*10 <sup>-4</sup>   | *** |
|              | MSI: LPI4-3 (ctrl) – LPI4-3 (T4/T5c block)          | Student's t-test                    | 7.7754*10 <sup>-5</sup>   | *** |
|              | PD: T4/T5c (ctrl) – T4/T5c (LPI4-3 block)           | Welch's t-test                      | 0.82811                   | ns  |
|              | ND: T4/T5c (ctrl) – T4/T5c (LPI4-3 block)           | Welch's t-test                      | 0.44474                   | ns  |
| Figure 6d    | TM: T4/T5c (ctrl) – T4/T5c (LPI4-3 block)           | Welch's t-test                      | 1.1206*10 <sup>-3</sup>   | **  |
|              | MSI: T4/T5c (ctrl) – T4/T5c (LPI4-3 block)          | Student's t-test                    | 2.5241*10 <sup>-5</sup>   | *** |
|              | RF area: VS – LPI3-4                                | Mann-Whitney U-test, Holm-corrected | 2.3722*10 <sup>-16</sup>  | *** |
|              | RF area: VS – LPI4-3                                | Mann-Whitney U-test, Holm-corrected | 3.3756*10 <sup>-16</sup>  | *** |
| Figure 6e    | RF area: LPI3-4 – T4/T5c                            | Mann-Whitney U-test, Holm-corrected | 2.0986*10 <sup>-65</sup>  | *** |
|              | RF area: LPI4-3 – T4/T5c                            | Mann-Whitney U-test, Holm-corrected | 1.5924*10 <sup>-61</sup>  | *** |
|              | tau: VS – LPI3-4                                    | Mann-Whitney U-test, Holm-corrected | 3.3009*10 <sup>-12</sup>  | *** |
|              | tau: VS – LPI4-3                                    | Mann-Whitney U-test, Holm-corrected | 6.4809*10 <sup>-13</sup>  | *** |
| Figure 6h    | tau: LPI3-4 – T4/T5c                                | Mann-Whitney U-test, Holm-corrected | 1.1806*10 <sup>-31</sup>  | *** |
|              | tau: LPI4-3 – T4/T5c                                | Mann-Whitney U-test, Holm-corrected | 7.7733*10 <sup>-18</sup>  | *** |
|              | T4/T5c                                              | Rayleigh z-test                     | 0.02834                   | *   |
|              | T4/T5d                                              | Rayleigh z-test                     | 0.02287                   | *   |
| Figure 7g    | T4/T5d (T4/T5c block)                               | Rayleigh z-test                     | 0.66186                   | ns  |
|              | Model with inhibition: local – global               | paired Student's t-test             | 1.3108*10 <sup>-169</sup> | *** |
|              | Model w/o inhibition: local – global                | paired Student's t-test             | 0.53761                   | ns  |
| Figure 7h    | Experiment: local – global                          | Wilcoxon signed-rank test           | 0.01738                   | *   |
|              | Model with inhibition: PD/ND sum – local            | paired Student's t-test             | 9.5638*10 <sup>-252</sup> | *** |
|              | Model w/o inhibition: PD/ND sum – local             | paired Student's t-test             | 6.6408*10 <sup>-175</sup> | *** |
| Figure 7i    | Experiment: PD/ND sum – local                       | Wilcoxon signed-rank test           | 0.00228                   | **  |
|              | Correlation: Diff. gain – diff. conduct. (PD)       | Wald test                           | 1.3917*10 <sup>-3</sup>   | **  |
| Ext. Fig. 1c | Correlation: Diff. gain – diff. conduct. (ND)       | Wald test                           | 3.6991*10 <sup>-3</sup>   | **  |
|              | Correlation: VS (ephys) – VS (ArcLight)             | Wald test                           | 6.2240*10 <sup>-7</sup>   | *** |
| Ext. Fig. 1d | MOI: VS (ephys) – VS (ArcLight)                     | Student's t-test                    | 0.22568                   | ns  |
|              | LDir: VS (ephys) – VS (ArcLight)                    | Student's t-test                    | 0.58362                   | ns  |
| Ext. Fig. 2k | MOI: VS (ArcLight) – VS (GCaMP)                     | Student's t-test                    | 1.3514*10 <sup>-7</sup>   | *** |
|              | MOI: LPI3-4 (ArcLight) – LPI3-4 (GCaMP)             | Student's t-test                    | 2.9343*10 <sup>-6</sup>   | *** |
|              | MOI: LPI4-3 (ArcLight) – LPI4-3 (GCaMP)             | Student's t-test                    | 7.6028*10 <sup>-7</sup>   | *** |
|              | MOI: T4c (ArcLight) – T4c (GCaMP)                   | Student's t-test                    | 0.90496                   | ns  |
| Ext. Fig. 2l | LDir: VS (ArcLight) – VS (GCaMP)                    | Student's t-test                    | 2.5110*10 <sup>-4</sup>   | *** |
|              | LDir: LPI3-4 (ArcLight) – LPI3-4 (GCaMP)            | Student's t-test                    | 2.9359*10 <sup>-6</sup>   | *** |
|              | LDir: LPI4-3 (ArcLight) – LPI4-3 (GCaMP)            | Student's t-test                    | 1.7654*10 <sup>-7</sup>   | *** |
|              | LDir: T4c (ArcLight) – T4c (GCaMP)                  | Student's t-test                    | 0.13371                   | ns  |
| Ext. Fig. 2m | PD: VS (ArcLight) – VS (GCaMP)                      | Student's t-test                    | 0.50524                   | ns  |
|              | PD: LPI3-4 (ArcLight) – LPI3-4 (GCaMP)              | Student's t-test                    | 0.79030                   | ns  |
|              | PD: LPI4-3 (ArcLight) – LPI4-3 (GCaMP)              | Student's t-test                    | 0.18735                   | ns  |
|              | PD: T4c (ArcLight) – T4c (GCaMP)                    | Student's t-test                    | 0.28244                   | ns  |
| Ext. Fig. 3c | PD local – ND local                                 | Wilcoxon signed-rank test           | 0.32587                   | ns  |
|              | PD global – ND global                               | Wilcoxon signed-rank test           | 0.64166                   | ns  |
| Ext. Fig. 6d | PD (90°) sine wave: dend – axon                     | paired Student's t-test             | 0.06152                   | ns  |
|              | ND (270°) sine wave: dend – axon                    | paired Student's t-test             | 3.2141*10 <sup>-3</sup>   | **  |
| Ext. Fig. 6e | MOI sine wave: dend – axon                          | paired Student's t-test             | 4.0932*10 <sup>-3</sup>   | **  |
|              | LDir sine wave: dend – axon                         | paired Student's t-test             | 0.01250                   | *   |
| Ext. Fig. 6h | PrefDir sine wave: dend – axon                      | paired Student's t-test             | 0.05741                   | ns  |
|              | PD (90°) dot motion: dend – axon                    | paired Student's t-test             | 0.82709                   | ns  |
| Ext. Fig. 6i | ND (270°) dot motion: dend – axon                   | paired Student's t-test             | 2.7845*10 <sup>-3</sup>   | **  |
|              | MOI dot motion: dend – axon                         | paired Student's t-test             | 0.45529                   | ns  |

|                     |                                           |                           |         |    |
|---------------------|-------------------------------------------|---------------------------|---------|----|
|                     | LDir dot motion: dend – axon              | paired Student's t-test   | 0.14394 | ns |
|                     | PrefDir dot motion: dend – axon           | paired Student's t-test   | 0.25177 | ns |
| <b>Ext. Fig. 6l</b> | PD (90°) edges: dend – axon               | Student's t-test          | 0.37722 | ns |
|                     | ND (270°) edges: dend – axon              | Student's t-test          | 0.59320 | ns |
| <b>Ext. Fig. 6m</b> | MOI edges: dend – axon                    | Student's t-test          | 0.45927 | ns |
|                     | LDir edges: dend – axon                   | Student's t-test          | 0.05213 | ns |
|                     | PrefDir edges: dend – axon                | Student's t-test          | 0.01100 | *  |
| <b>Ext. Fig. 8c</b> | Model with inhibition: PD/ND sum – global | paired Student's t-test   | 1.0     | ns |
|                     | Model w/o inhibition: PD/ND sum – global  | paired Student's t-test   | 1.0     | ns |
|                     | Experiment: PD/ND sum – global            | Wilcoxon signed-rank test | 0.46300 | ns |

**Supplementary Table 3. Sources of experimental animals, reagents and software**

| Resource                                   | Source                            | Identifier                       |
|--------------------------------------------|-----------------------------------|----------------------------------|
| <b>Antibodies</b>                          |                                   |                                  |
| anti-brp (nc82) mouse monoclonal antibody  | DSHB                              | RRID: AB_2314866                 |
| anti-GFP chicken polyclonal antibody       | Rockland                          | Cat# 600-901-215S                |
| anti-DsRed rabbit polyclonal antibody      | Takara Bio                        | RRID: AB_10013483                |
| donkey anti-chicken-Alexa-488              | Jackson Immuno Research           | Cat# 703-545-155                 |
| goat anti-rabbit-Alexa-568                 | Invitogen                         | Cat# A-11011                     |
| goat anti-mouse-Alexa-647                  | Invitrogen                        | Cat# A32728                      |
| <b>Experimental animals</b>                |                                   |                                  |
| w-; +; R20D01-Gal4 (LPi3-4 cells)          | BDSC                              | RRID: BDSC_48889                 |
| w-; VT61221-AD; VT45575-DBD (LPi3-4 cells) | BDSC                              | RRID: BDSC_86823                 |
| w-; +; R24E09-Gal4 (VS/HS cells)           | BDSC                              | RRID: BDSC_49083                 |
| w-; VT58487-AD; R35G07-DBD (VS/HS cells)   | BDSC                              | RRID: BDSC_86824                 |
| w-; +; R38G02-Gal4 (LPi4-3 cells)          | BDSC                              | RRID: BDSC_50016                 |
| w-; R38G02-AD; R24A07-DBD (LPi4-3 cells)   | BDSC                              | RRID: BDSC_76004                 |
| w-; +; R42F06-Gal4 (T4/T5 cells)           | BDSC                              | RRID: BDSC_41253                 |
| w-; VT15785-AD; VT50384-DBD (T4c cells)    | Tirian et al., bioRxiv, 2017      | N/A                              |
| w-; +; VT50384-Gal4/Tm6b (T4/T5c cells)    | Tirian et al., bioRxiv, 2017      | N/A                              |
| w-; +; VT50384-lexA/Tm6b (T4/T5c cells)    | Tirian et al., bioRxiv, 2017      | N/A                              |
| w-; 20xUAS-IVS-GCaMP6f; +                  | BDSC                              | RRID: BDSC_42747                 |
| w-; +; 20xUAS-IVS-GCaMP6f                  | BDSC                              | RRID: BDSC_52869                 |
| w-; +; 13xlexAop-IVS-GCaMP6m               | BDSC                              | RRID: BDSC_44277                 |
| w-; UAS-ArcLight; +                        | BDSC                              | RRID: BDSC_51057                 |
| w-; +; UAS-ArcLight                        | BDSC                              | RRID: BDSC_51056                 |
| w-; UAS-TNT; +                             | BDSC                              | RRID: BDSC_28838                 |
| w-; +; 13xlexAop-IVS-TNT:HA                | Karuppururai et al., Neuron, 2014 | N/A                              |
| w+; UAS-GluCl $\alpha$ -RNAi; +            | BDSC                              | RRID: BDSC_53356                 |
| w+; UAS-GluRIIA-RNAi; +                    | BDSC                              | RRID: BDSC_40844                 |
| w-; UAS-GluCl $\alpha$ -GFP; +             | BDSC                              | RRID: BDSC_92151                 |
| w-; UAS-Rdl-GFP; +                         | BDSC                              | RRID: BDSC_92150                 |
| w-; UAS-nAChR-Da7-GFP; +                   | Fendl et al., eLife, 2020         | N/A                              |
| w-; +; UAS-tdTomato                        | BDSC                              | RRID: BDSC_32221                 |
| norpA <sup>7</sup> ; +; +                  | BDSC                              | RRID: BDSC_5685                  |
| w-; UAS-ChR2-H134R-mCherry; +              | Mauss et al., JNeurosci, 2014     | N/A                              |
| <b>Software and algorithms</b>             |                                   |                                  |
| MATLAB                                     | MathWorks                         | mathworks.com                    |
| Python 2.7.15 and 3.8.8                    | Python Software Foundation        | python.org                       |
| ScanImage 3.8                              | Vidrio Technologies               | scanimage.vidriotechnologies.com |
| ImageJ/Fiji                                | National Institutes of Health     | imagej.nih.gov/ij/               |
| neuPrint                                   | Janelia Research Campus           | neuprint.janelia.org             |
| <b>Deposited data</b>                      |                                   |                                  |
| Data and code for this paper               | G-Node GIN                        | doi: 10.12751/g-node.7v3pe6      |
